# Supplementary material
Source: publisher site journal article supplement (https://www.dovepress.com/article/239039)
Supplement: Supplementary file 1 [file get_supplementary_file.php]

**SUPPLEMENTARY MATERIAL I:**

**R script written to reconstruct and visualise the network**

**#-----------------------------------------------**

**############## Section 1: Set up ###############**

**#-----------------------------------------------**

**### 1.1. Launch required packages ###**

library(MetaboSignal) #allows analysis of metabolic and signalling pathways on KEGG

library(KEGGREST) #provides access to KEGG REST interface

library(dplyr) #set of tools for efficiently manipulating datasets in R

**### 1.2. Find the KEGG identifier for humans ###**

MS_keggFinder(KEGG_database = "organism", match = "sapiens")

# $sapiens

# T organism_code

# "T01001" "hsa"

# organism_name description

# "Homo sapiens (human)" "Eukaryotes;Animals;Vertebrates;Mammals"

**### 1.3. Find KEGG IDs for all relevant pathways ###**

# pathways to include:

# Pyrimidine metabolism,

# arginine biosynthesis,

# Alanine, aspartate and glutamate metabolism

MS_keggFinder(KEGG_database = "pathway", match = c("Pyrimidine metabolism",

"arginine biosynthesis",

"Alanine, aspartate and glutamate metabolism"),

organism_code = "hsa")

# $`pyrimidine metabolism`

# path_ID

# "path:hsa00240"

# $`arginine biosynthesis`

# path_ID

# "path:hsa00220"

# $`alanine, aspartate and glutamate metabolism`

# path_ID

# "path:hsa00250"

**### 1.4 Save each pathway as separate tables ###**

table_arg <- MS_keggNetwork(metabo_paths = c("hsa00220"),expand_genes = T)

table_pyr <- MS_keggNetwork(metabo_paths = c("hsa00240"),expand_genes = T)

table_ala <- MS_keggNetwork(metabo_paths = c("hsa00250"),expand_genes = T)

**### 1.5. Merge the pathways ###**

table_merged <- rbind(table_arg, table_pyr, table_ala)

**### 1.6. Remove duplicates ###**

table_merged_distinct <- as.matrix(distinct(as_tibble(table_merged)))

**### 1.7. change node KEGG IDs to common names ###**

table_merged_distinct2 <- MS_changeNames(table_merged_distinct, "hsa")

**#----------------------------------------------------------------------------------**

**#-----------------------------------------------**

**############ Section 2: Filtering ##############**

**#-----------------------------------------------**

**### 2.1. Filter based on distance from target genes (CPS1 and CAD) ###**

**###### 2.1.1. calculate distances from CAD ######**

dis_CAD <- t(MS_distances(table_merged_distinct, organism_code = "hsa",

source_genes = c("hsa:790"), target_metabolites = "all",

names = FALSE))

dis_CAD <- (dis_CAD+1)/2

**###### 2.1.2. SUMMARY STATISTICS for distances of metabolites from CPS1 ######**

## Plot the distribution of distances of metabolites from CAD

hist(dis_CAD) #Figure S1

## The number of metabolites that are further than 3 reactions away from CAD

sum(dis_CAD>3)

# 35

## row names of those further than 3 reactions away from CAD

MS_changeNames(rownames(dis_CAD)[which(dis_CAD>3)])

# [1] "N-Acetylornithine"

# [2] "UDP"

# [3] "Uracil"

# [4] "Uridine"

# [5] "5,6-Dihydrouracil"

# [6] "3-Ureidopropionate"

# [7] "CDP"

# [8] "CMP"

# [9] "dCDP"

# [10] "dCTP"

# [11] "dCMP"

# [12] "dUMP"

# [13] "dUDP"

# [14] "dUTP"

# [15] "Deoxyuridine"

# [16] "dTDP"

# [17] "dTTP"

# [18] "dTMP"

# [19] "Thymine"

# [20] "(R)-5,6-Dihydrothymine"

# [21] "(R)-3-Ureidoisobutyrate"

# [22] "Cytidine"

# [23] "Deoxycytidine"

# [24] "Thymidine"

# [25] "P1,P4-Bis(5'-uridyl)-tetraphosphate"

# [26] "2'-Deoxy-5-hydroxymethylcytidine-5'-diphosphate"

# [27] "2-Oxosuccinamate"

# [28] "D-Aspartate"

# [29] "2-Oxoglutaramate"

# [30] "Urea"

# [31] "beta-Alanine"

# [32] "2-Deoxy-D-ribose-1-phosphate"

# [33] "(R)-3-Amino-2-methylpropanoate"

# [34] "2'-Deoxy-5-hydroxymethylcytidine-5'-triphosphate"

# [35] "Succinate"

**###### 2.1.3. calculate distances from CPS1 ######**

dis_CPS1 <- t(MS_distances(table_merged_distinct, organism_code = "hsa",

source_genes = c("hsa:1373"), target_metabolites = "all",

names = FALSE))

dis_CPS1 <- (dis_CPS1+1)/2

**###### 2.1.4. SUMMARY STATISTICS for distances of metabolites from CPS1 ######**

## Plot the distribution of distances of metabolites from CPS1

hist(dis_CPS1) #Figure S2

## The number of metabolites that are further than 3 reactions away form CPS1

sum(dis_CPS1>3)

# 50

## row names of those further than 3 reactions away from CPS1

MS_changeNames(rownames(dis_CPS1)[which(dis_CPS1>3)])

# [1] "Fumarate"

# [2] "N-Acetylornithine"

# [3] "Orotidine-5'-phosphate"

# [4] "5-Phospho-alpha-D-ribose-1-diphosphate"

# [5] "UDP"

# [6] "UTP"

# [7] "UMP"

# [8] "Uracil"

# [9] "Uridine"

# [10] "5,6-Dihydrouracil"

# [11] "3-Ureidopropionate"

# [12] "CDP"

# [13] "CTP"

# [14] "CMP"

# [15] "dCDP"

# [16] "dCTP"

# [17] "dCMP"

# [18] "dUMP"

# [19] "dUDP"

# [20] "dUTP"

# [21] "Deoxyuridine"

# [22] "dTDP"

# [23] "dTTP"

# [24] "dTMP"

# [25] "Thymine"

# [26] "(R)-5,6-Dihydrothymine"

# [27] "(R)-3-Ureidoisobutyrate"

# [28] "Cytidine"

# [29] "Deoxycytidine"

# [30] "Thymidine"

# [31] "P1,P4-Bis(5'-uridyl)-tetraphosphate"

# [32] "2'-Deoxy-5-hydroxymethylcytidine-5'-diphosphate"

# [33] "L-Alanine"

# [34] "Pyruvate"

# [35] "Succinate-semialdehyde"

# [36] "N-Acetylaspartylglutamate"

# [37] "2-Oxosuccinamate"

# [38] "D-Aspartate"

# [39] "2-Oxoglutaramate"

# [40] "N-Acetylaspartylglutamylglutamate"

# [41] "Citrate"

# [42] "Urea"

# [43] "beta-Alanine"

# [44] "2-Deoxy-D-ribose-1-phosphate"

# [45] "(R)-3-Amino-2-methylpropanoate"

# [46] "2'-Deoxy-5-hydroxymethylcytidine-5'-triphosphate"

# [47] "Succinate"

# [48] "D-Glucosamine-6-phosphate"

# [49] "5-Phosphoribosylamine"

# [50] "beta-Citryl-L-glutamate"

**###### 2.1.5. Filter out those more than 3 steps away from CPS1 or CAD ######**

far_CAD <- rownames(dis_CAD)[dis_CAD>3]

# this gives the compound names of those further than 3 reactions from CAD

far_CAD_ind <- NULL

# FOR loop that finds row indices in column 1 of the table

for(i in 1:length(far_CAD)){

far_CAD_ind <- append(far_CAD_ind, grep(far_CAD[i], table_merged_distinct[,1]))

}

# FOR loop that finds row indices in column 2 of the table

for(i in 1:length(far_CAD)){

far_CAD_ind <- append(far_CAD_ind, grep(far_CAD[i], table_merged_distinct[,2]))

}

# delete the rows that are in far_CAD_ind

table_distance_filtered <- table_merged_distinct[-far_CAD_ind,]

far_CPS1 <- rownames(dis_CPS1)[dis_CPS1>3]

# this gives the compound names of those further than 3 reactions from CPS1

far_CPS1_ind <- NULL

# FOR loop that finds row indices in column 1 of the table

for(i in 1:length(far_CPS1)){

far_CPS1_ind <- append(far_CPS1_ind, grep(far_CPS1[i], table_distance_filtered[,1]))

}

# FOR loop that finds row indices in column 2 of the table

for(i in 1:length(far_CPS1)){

far_CPS1_ind <- append(far_CPS1_ind, grep(far_CPS1[i], table_distance_filtered[,2]))

}

# delete the rows that are in far_CPS1_ind

table_distance_filtered2 <- table_distance_filtered[-far_CPS1_ind,]

**#----------------------------------------------------------------------------------**

**#-----------------------------------------------**

**######### Section 3: Create edge table #########**

**#-----------------------------------------------**

edgeTable <- data.frame(sourceID = as.character(table_distance_filtered2[,1]),

targetID = as.character(table_distance_filtered2[,2]),

interaction_type = table_distance_filtered2[,3])

edgeTable$interaction_type <- as_factor(gsub("k_compound:","",edgeTable$interaction_type))

summary(edgeTable$interaction_type)

# k_compound:irreversible k_compound:reversible

# 82 56

**#----------------------------------------------------------------------------------**

# A functions was developed to create a node table by utilising the edge table.

# Both a node and an edge table are required to visualise a network.

# The created node table was such that in included data from Human Protein Atlas

# and Human Metabolome Database regarding each gene's expression levels in hepatocytes,

# their associations with prognosis and whether each metabolite could be detected in normal

# and abnormal urine, and in which relevant conditions. These functions can be found in SECTION 6

# The code found in Section 6 was run PRIOR to running Sections 4 and 5

**#----------------------------------------------------------------------------------**

**#-----------------------------------------------**

**######### Section 4: Create node table #########**

**#-----------------------------------------------**

nodeTable_ini <- createNodeTbl(edgeTable)

# Add Human protein atlas data

nodeTable_out <- add_hpaNT_info(nodeTable_ini,filter_level="cell",filter_type="hepatocytes",addID=F)

nodeTable_out <- add_hpaC_info(nodeTable_out,cancer_type="liver cancer",addID=F)

# Add HMDB data

cpd_HMDB <- read_csv("cpd_HMDB_info.csv")

cpd_HMDB <- subset(cpd_HMDB, select = -c(nodeName))

nodeTable_out <- nodeTableOUT <- dplyr::left_join(nodeTable_out, cpd_HMDB, by = "keggID")

nodeTable_fin <- nodeTable_out

**#----------------------------------------------------------------------------------**

**#-----------------------------------------------**

**##### Section 5: Export for visualisation ######**

**#-----------------------------------------------**

exportName <- "network"

# Edge table

write.csv(edgeTable,file = paste0(exportName,"_edgeTable.csv"),row.names = F)

# Node table

write.csv(nodeTable_fin,file = paste0(exportName,"_nodeTable.csv"),row.names = F)

# save as RData

save(table_distance_filtered2, edgeTable, nodeTable_ini, nodeTable_fin,file = "network_data.RData")

**#----------------------------------------------------------------------------------**

**#-------------------------------------------------------------------**

**##### Section 6: Functions developed for node and edge tables ######**

**#-------------------------------------------------------------------**

**### 6.1. Load required packages ###**

library(KEGGREST) #provides access to KEGG REST interface

library(hpar) #provides access to Human Protein Atlas data

library(org.Hs.eg.db) #Genome wide annotation for Human

**### 6.2. Create node table from edge table ###**

createNodeTbl <- function(edgeTable){

# edgeTable: data.frame - has the first 2 columns being the source and targets of the network edges

keggID <- unique(c(as.matrix(edgeTable[,1:2])))

nodeName <- MS_changeNames(keggID,"hsa")

nodeType <- character(length(keggID))

nodeType[grep("cpd:",keggID)] <- "compound"

nodeType[grep("hsa:",keggID)] <- "gene"

nodeType <- factor(nodeType)

nodeTypeMS <- sapply(keggID,MetaboSignal:::get_molecule_type,organism_code = "hsa")

nodeTypeMS <- factor(nodeTypeMS)

nodeTable <- data.frame(keggID,nodeName,nodeType,nodeTypeMS,row.names=NULL,stringsAsFactors = F)

return(nodeTable)

}

add_hpaNT_info <- function(nodeTable,filter_level="cell",filter_type="hepatocytes",addID=T){

# nodeTable: data.frame - output from createNodeTbl

# filter_level: string - "cell" or "tissue"

# filter_type: string - cell or tissue type of interest

# addID: logical - whether to add columns of entrez and ensembl IDs

#}

nodeTable_gene <- data.frame(keggID = nodeTable$keggID[nodeTable$nodeType=="gene"],stringsAsFactors = F)

nGene <- nrow(nodeTable_gene)

df_ID <- .get_ensemblID(nodeTable_gene$keggID,nGene)

# -----hpaNT data-----

hparNT <- hpaNormalTissue

if (filter_level=="cell"){

hparNT_filtered <- hparNT[hparNT$Cell.type==filter_type,]

}

# else if (filter_level=="tissue"){

# # ** handle duplicates if filter by tissue **

# } else stop("filter_level must either be "cell" or "tissue")

hparNTlevel <- character(nGene)

hparNTreliability <- character(nGene)

for(ii in 1:nGene){

if(length(which(hparNT_filtered$Gene==df_ID$ensemblID[ii]))>0){

hpar_ind <- which(hparNT_filtered$Gene==df_ID$ensemblID[ii])

hparNTlevel[ii] <- as.character(hparNT_filtered$Level[hpar_ind])

hparNTreliability[ii] <- as.character(hparNT_filtered$Reliability[hpar_ind])

}

}

hparNTlevel <- ordered(hparNTlevel,levels = c("Low","Medium","High","Not detected"))

hparNTreliability <- ordered(hparNTreliability,levels = c("Approved","Enhanced","Supported","Uncertain"))

# -----gather and match back to main table-----

if (addID){

nodeTable_gene <- data.frame(keggID = nodeTable_gene$keggID,

entrezID = df_ID$entrezID,

ensemblID = df_ID$ensemblID,

hparNTlevel,

hparNTreliability,

stringsAsFactors = F)

} else {

nodeTable_gene <- data.frame(keggID = nodeTable_gene$keggID,hparNTlevel,hparNTreliability,stringsAsFactors = F)

}

nodeTableOUT <- dplyr::full_join(nodeTable, nodeTable_gene, by = "keggID")

return(nodeTableOUT)

}

add_hpaC_info <- function(nodeTable,cancer_type="liver cancer",addID=F){

# FUN: add_hpaCancer_info

# Input: node table

# cancerType + str()

# addID = logical()

# Output: node table with info added

nodeTable_gene <- data.frame(keggID = nodeTable$keggID[nodeTable$nodeType=="gene"],stringsAsFactors = F)

nGene <- nrow(nodeTable_gene)

df_ID <- .get_ensemblID(nodeTable_gene$keggID,nGene)

# -----hpaC data-----

data(hpaCancer)

hparC <- hpaCancer

hparC_filtered <- hparC[hparC$Cancer==cancer_type,]

colnames(hparC_filtered)[1] <- "ensemblID"

hparC_filtered$ensemblID <- as.character(hparC_filtered$ensemblID)

hparC_filtered <- subset(hparC_filtered, select = -c(Gene.name,Cancer))

nodeTable_gene <- dplyr::left_join(df_ID, hparC_filtered, by = "ensemblID")

# -----gather and match back to main table-----

if (!addID){

nodeTable_gene <- subset(nodeTable_gene, select = -c(ensemblID))

}

nodeTableOUT <- dplyr::left_join(nodeTable, nodeTable_gene, by = "keggID")

return(nodeTableOUT)

}

.get_ensemblID <- function(keggID,nGene){

# KEGG to ENTREZ

# ** allow hsa only **

entrezID <- as.numeric(gsub("hsa:","",keggID))

# ENTREZ to ENSEMBL

X = org.Hs.egENSEMBL

mapped_genes = mappedkeys(X)

xx = as.list(X[mapped_genes])

ensemblID <- character(nGene)

for(ii in 1:length(ensemblID)){

ensemblID[ii] <-paste(xx[[grep(paste0("^",as.character(entrezID[ii]),"$"),names(xx))]][1], collapse = ', ')

# *** fix to take into account 2 ensembl IDs

}

df_out <- data.frame(keggID = keggID,entrezID = entrezID, ensemblID = ensemblID,stringsAsFactors = F)

return(df_out)

}

**#----------------------------------------------------------------------------------**


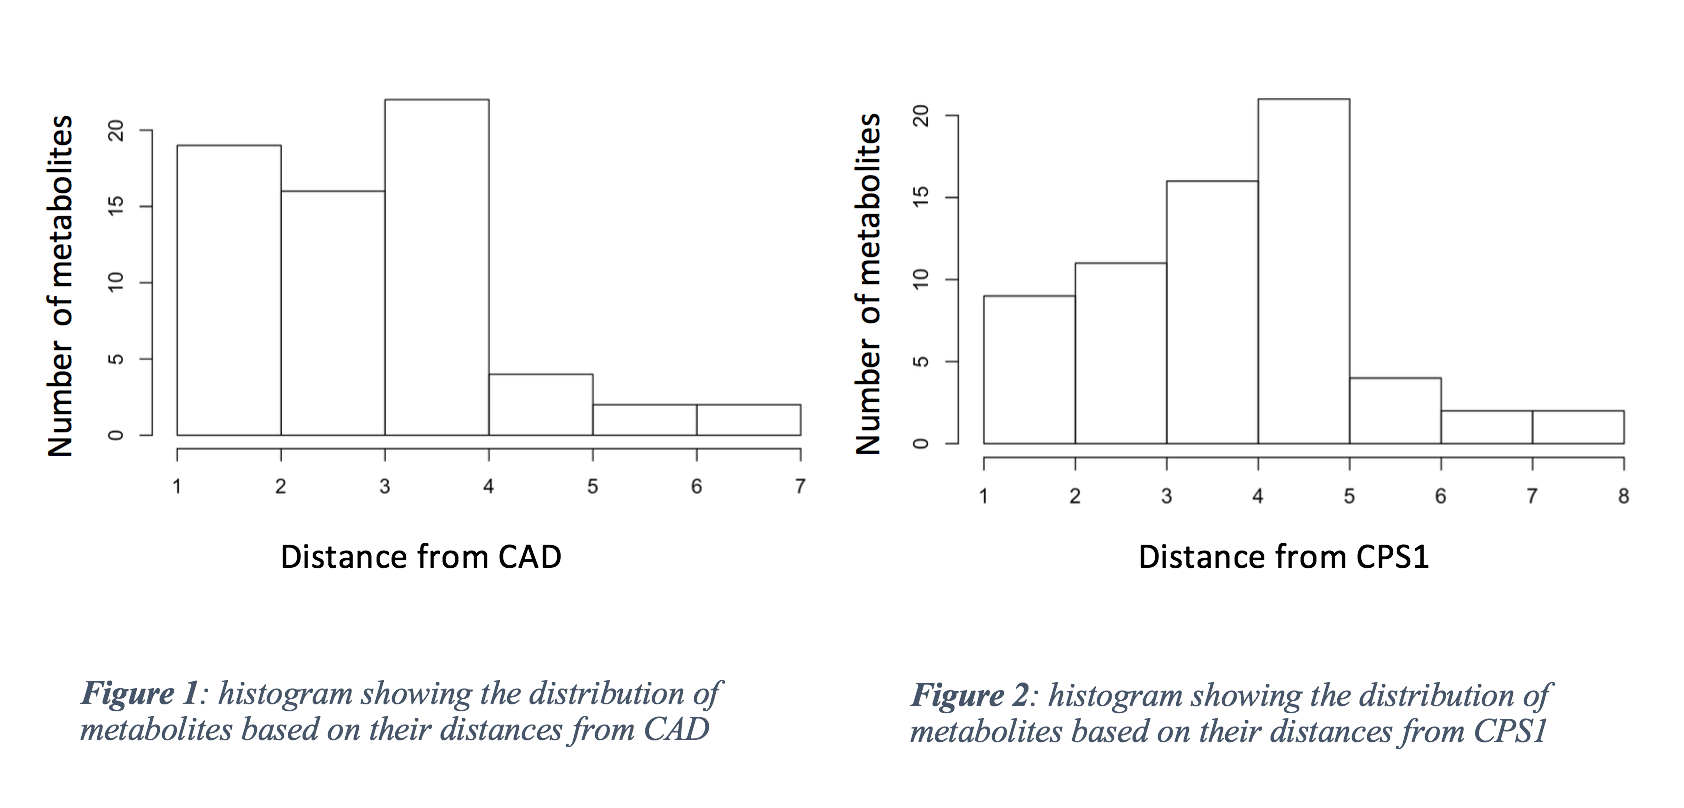


***Figure S2****: histogram showing the distribution of metabolites based on their distances from CPS1.*

***Figure S1****: histogram showing the distribution of metabolites based on their distances from CAD.*

**SUPPLEMENTARY MATERIAL II**

**Tables summarising the nodes table used in the network**

**Table S1:** Summary of compounds within the network

| **kegg ID** | **name** | Found in normal urine? | Found in abnormal urine? | If found in abnormal urine, what cancers or relevant conditions? |
| --- | --- | --- | --- | --- |
| **cpd:C00025** | **L-Glutamate** | yes | yes | Bladder cancer, Colorectal cancer, oesophago-gastric cancer |
| **cpd:C00014** | **Ammonia** | yes | no | NA |
| **cpd:C00062** | **L-Arginine** | yes | yes | Colorectal cancer |
| **cpd:C00327** | **L-Citrulline** | yes | no | NA |
| **cpd:C03406** | **N-(L-Arginino)succinate** | yes | yes | no relevant conditions |
| **cpd:C00049** | **L-Aspartate** | yes | yes | cirrhosis |
| **cpd:C00169** | **Carbamoyl-phosphate** | no | no | NA |
| **cpd:C00077** | **L-Ornithine** | yes | yes | Bladder cancer |
| **cpd:C00064** | **L-Glutamine** | yes | no | NA |
| **cpd:C00026** | **2-Oxoglutarate** | yes | yes | Bladder cancer |
| **cpd:C00438** | **N-Carbamoyl-L-aspartate** | no | no | NA |
| **cpd:C00337** | **(S)-Dihydroorotate** | no | no | NA |
| **cpd:C00295** | **Orotate** | yes | yes | OTC-deficiency, Bladder cancer |
| **cpd:C00036** | **Oxaloacetate** | yes | no | NA |
| **cpd:C00334** | **4-Aminobutanoate** | yes | yes | Bladder cancer |
| **cpd:C03912** | **(S)-1-Pyrroline-5-carboxylate** | no | no | NA |
| **cpd:C01042** | **N-Acetyl-L-aspartate** | yes | yes | Bladder cancer |
| **cpd:C00152** | **L-Asparagine** | yes | yes | no relevant conditions |
| **cpd:C03794** | **N6-(1,2-Dicarboxyethyl)-AMP** | no | no | NA |
| **cpd:C00624** | **N-Acetyl-L-glutamate** | yes | yes | Bladder cancer, prostate cancer |

Metabolites that were filtered out due to a lack of connection to the network following hepatocyte filter have been labelled in red.

**Table S2**: Summary of the genes within the network

| **Kegg ID** | **Name** | **Normal tissue level in hepatocytes** | **Prognostic**  **favourable** | **Prognostic**  **Unfavourable** |
| --- | --- | --- | --- | --- |
| **METABOLIC GENES** | | | | |
| **hsa:2747** | **GLUD2** | High | NA | NA |
| **hsa:2746** | **GLUD1** | High | NA | NA |
| **hsa:4842** | **NOS1** | Not detected | NA | NA |
| **hsa:4843** | **NOS2** | Not detected | NA | NA |
| **hsa:4846** | **NOS3** | Not detected | NA | NA |
| **hsa:435** | **ASL** | High | NA | NA |
| **hsa:95** | **ACY1** | High | NA | NA |
| **hsa:100526760** | **ABHD14A-ACY1** | Not detected | NA | NA |
| **hsa:162417** | **NAGS** | NA | NA | NA |
| **hsa:384** | **ARG2** | Low | NA | NA |
| **hsa:383** | **ARG1** | High | NA | NA |
| **hsa:445** | **ASS1** | High | NA | NA |
| **hsa:5009** | **OTC** | High | NA | NA |
| **hsa:1373** | **CPS1** | High | 6.93E-05 | NA |
| **hsa:2752** | **GLUL** | Medium | NA | NA |
| **hsa:27165** | **GLS2** | High | NA | NA |
| **hsa:1503** | **CTPS1** | Medium | NA | NA |
| **hsa:440** | **ASNS** | Not detected | NA | 9.42E-06 |
| **hsa:56474** | **CTPS2** | Low | NA | 2.38E-05 |
| **hsa:8833** | **GMPS** | NA | NA | 8.73E-07 |
| **hsa:2744** | **GLS** | Medium | NA | NA |
| **hsa:790** | **CAD** | Low | NA | 1.72E-11 |
| **hsa:2805** | **GOT1** | High | NA | NA |
| **hsa:2806** | **GOT2** | High | 5.75E-05 | NA |
| **hsa:84706** | **GPT2** | Not detected | NA | NA |
| **hsa:2875** | **GPT** | High | 1.47E-05 | NA |
| **hsa:7372** | **UMPS** | NA | NA | NA |
| **hsa:1723** | DHODH | High | NA | NA |
| **hsa:18** | **ABAT** | High | 5.36E-05 | NA |
| **hsa:8659** | **ALDH4A1** | High | NA | NA |
| **hsa:443** | **ASPA** | Low | NA | NA |
| **hsa:56954** | **NIT2** | High | NA | NA |
| **hsa:80150** | **ASRGL1** | Not detected | NA | 0.0009456 |
| **hsa:339983** | **NAT8L** | NA | NA | NA |
| **hsa:259307** | **IL4I1** | Not detected | NA | NA |
| **hsa:8528** | **DDO** | Medium | NA | NA |
| **hsa:122622** | **ADSSL1** | NA | NA | NA |
| **hsa:159** | **ADSS** | Medium | NA | NA |
| **hsa:2571** | **GAD1** | Not detected | NA | NA |
| **hsa:2572** | **GAD2** | Not detected | NA | NA |
| **hsa:2346** | **FOLH1** | Low | 0.0004251 | NA |
| **hsa:158** | **ADSL** | High | NA | 5.81E-08 |
| **hsa:9945** | **GFPT2** | Medium | NA | NA |
| **hsa:2673** | **GFPT1** | NA | NA | NA |
| **hsa:5471** | **PPAT** | Low | NA | 1.14E-08 |
| **hsa:57494** | **RIMKLB** | NA | NA | NA |
| **hsa:284716** | **RIMKLA** | NA | NA | NA |
| **SIGNALLING GENES** | | | | |
| **hsa:374569** | **ASPG** | Low | NA | NA |
| **hsa:10003** | **NAALAD2** | Low | NA | NA |
| **hsa:10004** | **NAALADL1** | Not detected | NA | NA |
| **hsa:254827** | **NAALADL2** | Not detected | NA | NA |

Genes that were filtered out due to their lack of detection in hepatocytes have been labelled in green.

Genes that were filtered out due to a lack of connection to the network following hepatocyte filter have been labelled in red.

Genes that were filtered out due to not being connected to at least two metabolites have been labelled in purple.

NA = information not available
